# Supplementary material for: Gravity driven ultrafast removal of organic contaminants across catalytic superwetting membranes
Source: Royal Society of Chemistry journal article supplement (doi:10.1039/c7ta08529j), 2017-01-01
Supplement: c7ta08529j1.pdf [file c7ta08529j1.pdf]

# Gravity driven ultrafast removal of organic contaminants across catalytic superwetting membrane

Zhigao Zhu, Lingling Zhong, Zhiqiang Zhang, Huarui Li, Wenxin Shi, Fuyi Cui\*, Wei Wang\*

State Key Laboratory of Urban Water Resource and Environment (SKLUWRE), School of  
Environment, Harbin Institute of Technology, Harbin 150090, P. R. China.

Corresponding Author

Email: wangweirs@hit.edu.cn and cuifuyi@hit.edu.cn

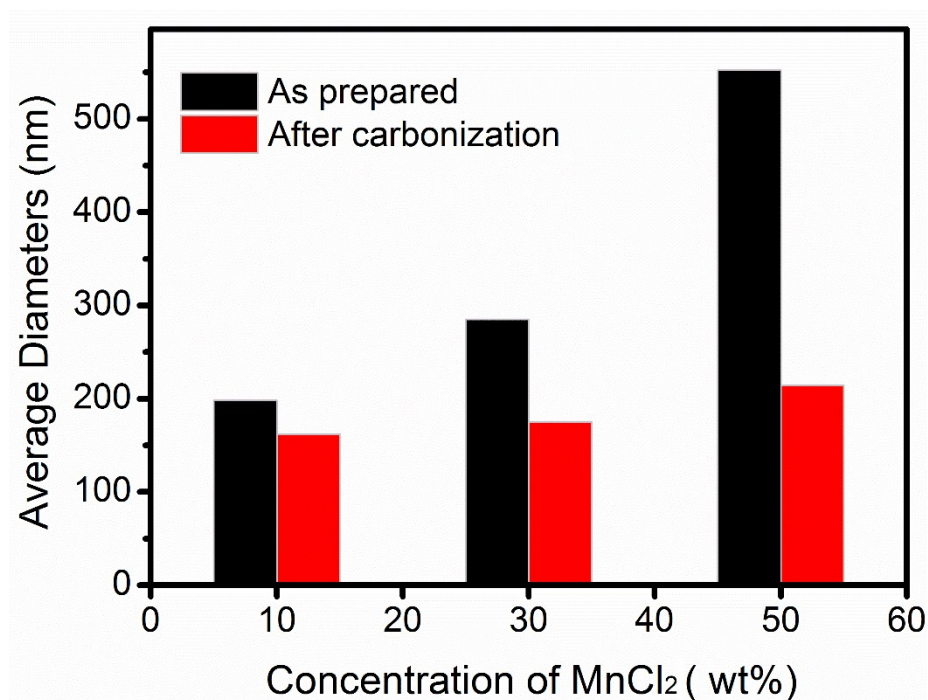

Fig. S1 Average diameters of the as-prepared MnCl<sub>2</sub>/PAN and relevant carbonized nanofibrous membranes with various contents of MnCl<sub>2</sub> to PAN: (a) 10, (b) 30 and (c) 50 wt%.

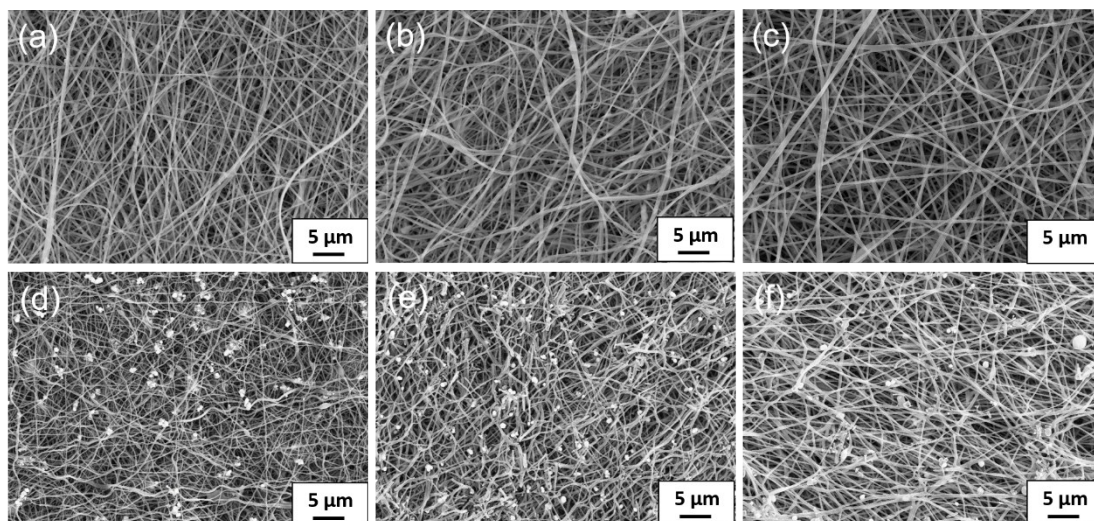

Fig. S2 FE-SEM images of the as-prepared and carbonized nanofibrous membranes fabricated from various atom ratios of Mn and Co. (a, d) 1/1, (b, e) 1/2 and (c, f) 0/1.

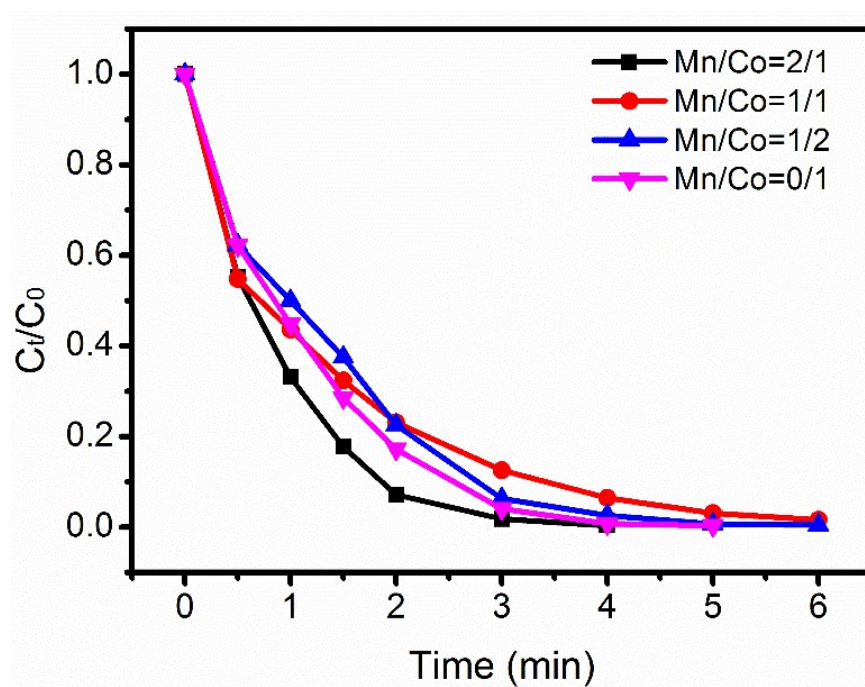

Fig. S3 Time dependence for MeB degradation using  $Mn_xCo_y@CNFs$  fabricated from various atom ratios of Mn and Co.

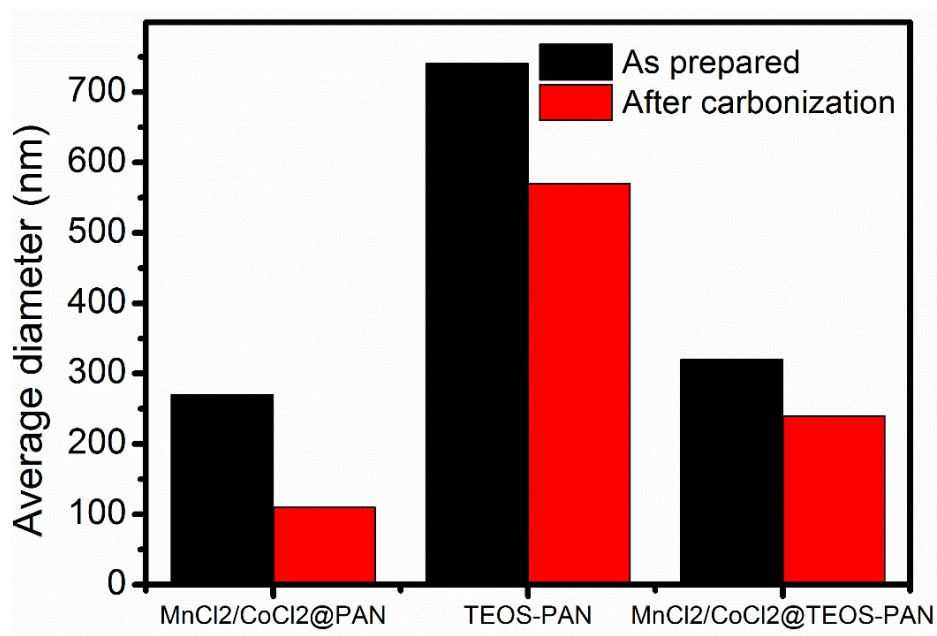

Fig. S4 Average diameters of relevant as-prepared and carbonized nanofibers.

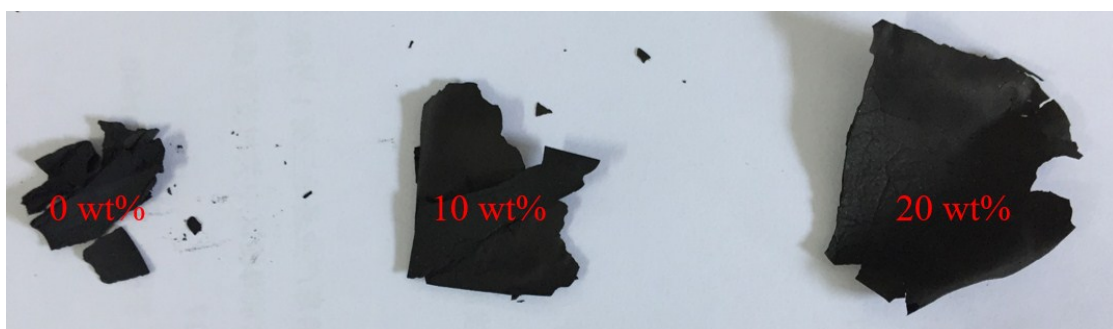

Fig. S5. Photographs showing the MnO/Co@SiO<sub>2</sub>-CNFMs containing various SiO<sub>2</sub> NPs.

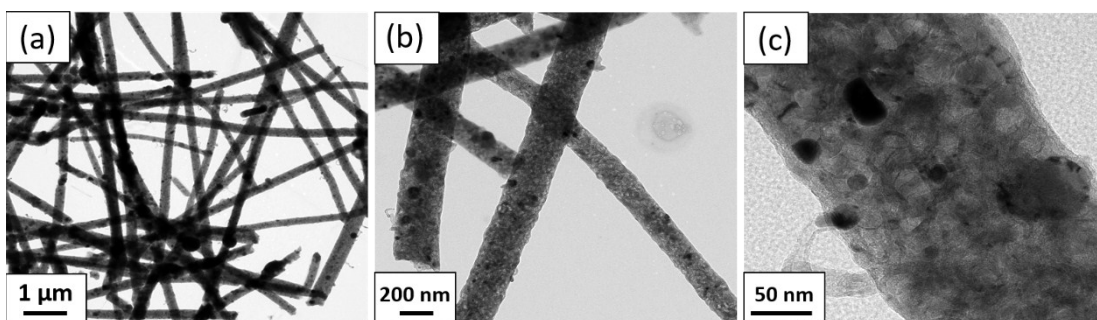

Fig. S6 Different magnification TEM images of MnO/Co@SiO<sub>2</sub>-CNFMs after 5 cycles filtration degradation.



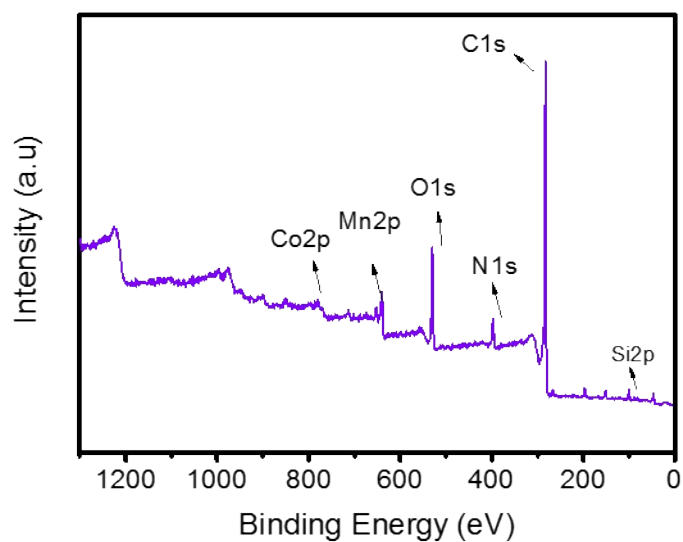

Fig. S7 XPS spectrum of MnO/Co@SiO<sub>2</sub>-CNFMs.

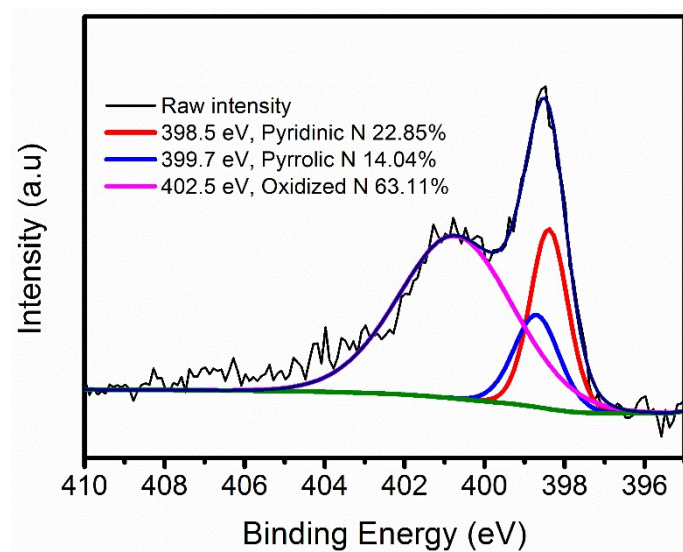

Fig. S8 High resolution N1s of MnO/Co@SiO<sub>2</sub>-CNFMs.
